# Supplementary material for: Multifunctional foams derived from poly(melamine formaldehyde) as recyclable oil absorbents
Source: Royal Society of Chemistry journal article supplement (doi:10.1039/c4ta00939h), 2014-01-01
Supplement: c4ta00939h1.pdf [file c4ta00939h1.pdf]

## Electronic Supplementary Information (ESI)

### Multifunctional foams derived from poly(melamine formaldehyde) as recyclable oil absorbents

Yu Yang,<sup>a</sup> Yonghong Deng,<sup>\*,b</sup> Zhen Tong<sup>a</sup> and Chaoyang Wang<sup>\*,a</sup>

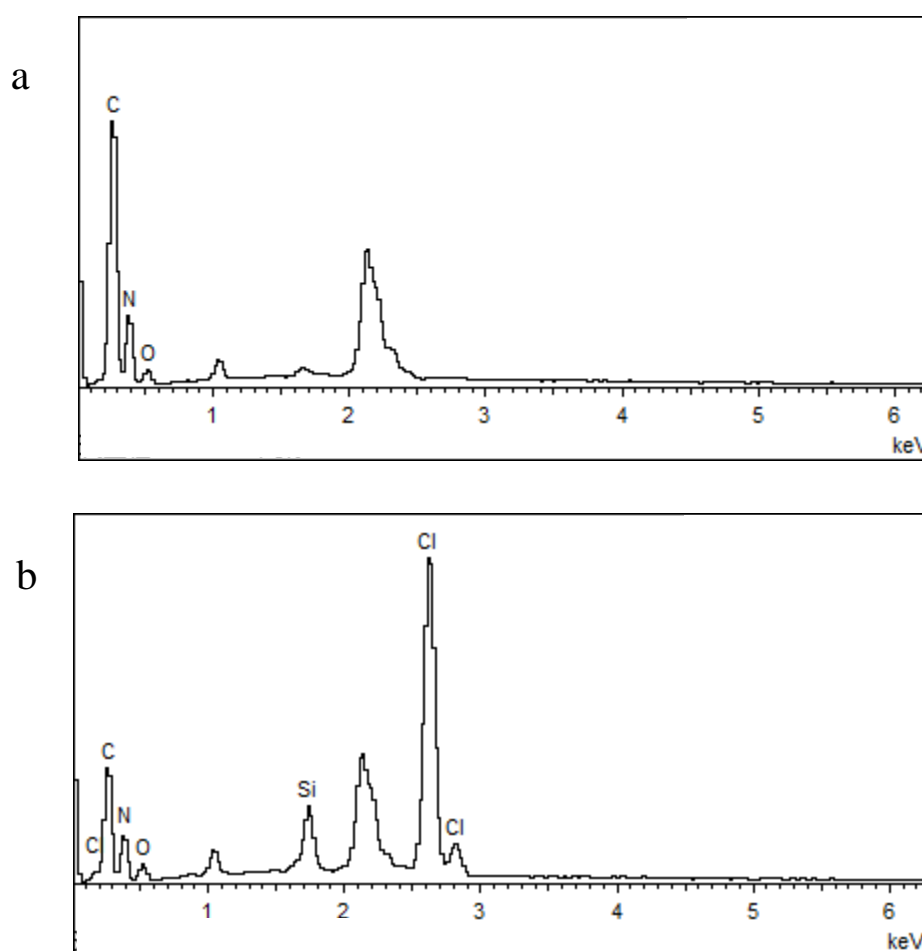

**Fig. S1.** EDS spectra of (a) PMF foam and (b) UFC foam. The mass amounts of carbon and nitrogen of PMF foam turn out to be 36% and 54%, respectively. The mass amount of nitrogen of UFC foam turns out to be 38%.

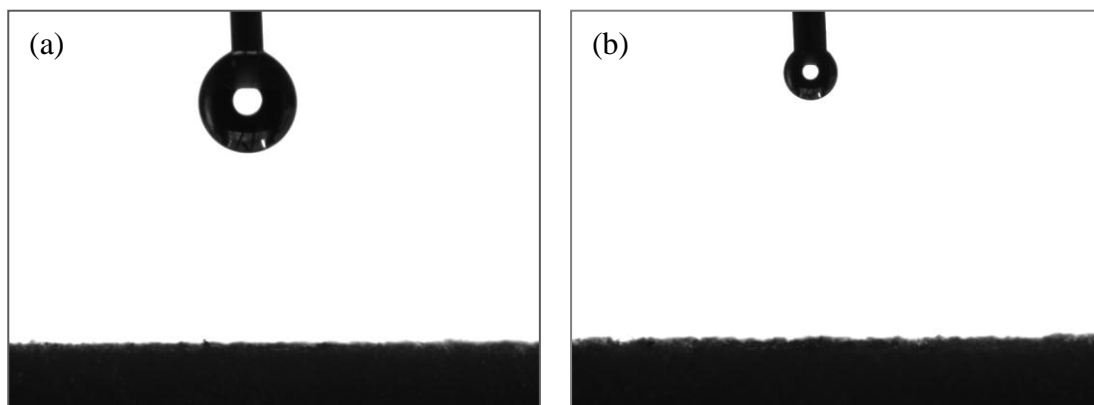

**Fig. S2.** The water wettability of (a) original and (b) pyrolysis-treated PMF foams.

The water contact angles turn out to be  $0^\circ$ , exhibiting superhydrophilicity.
